# Supplementary material for: Variations in the Strength of Association between Food Neophobia and Food and Beverage Acceptability: A Data-Driven Exploratory Study of an Arousal Hypothesis
Source: MDPI journal article supplement (doi:10.3390/nu13103657), 2021-10-19

## Supplementary Materials

**Table S1a.** Summary participant characteristics for Study 1 (USA: n=1563), shown as percentages.

|                                    |                         | Total sample |
|------------------------------------|-------------------------|--------------|
| <b>Gender</b>                      |                         |              |
|                                    | Men                     | 50           |
|                                    | Women                   | 50           |
| <b>Age in years</b>                |                         |              |
|                                    | 18-39                   | 50           |
|                                    | 40-65                   | 50           |
| <b>Education level*</b>            |                         |              |
|                                    | Less than high school   | 1            |
|                                    | High school or GED      | 15           |
|                                    | Associate/technical     | 10           |
|                                    | Some college            | 22           |
|                                    | College                 | 36           |
|                                    | Postgraduate            | 16           |
| <b>Household member*</b>           |                         |              |
|                                    | No-one, I live alone    | 22           |
|                                    | Spouse/partner          | 55           |
|                                    | Child/ren aged under 18 | 33           |
|                                    | Child/ren aged over 18  | 9            |
|                                    | Parents                 | 12           |
|                                    | Housemate/s             | 6            |
|                                    | Other                   | 3            |
| <b>Household income (USD/year)</b> |                         |              |
|                                    | Less than \$30,000      | 21           |
|                                    | \$30,000 - \$54,999     | 24           |
|                                    | \$55,000 - \$84,999     | 21           |
|                                    | \$85,000 - \$99,999     | 10           |
|                                    | \$100,000 or more       | 21           |
|                                    | Prefer not to answer    | 3            |
| <b>Ethnicity*</b>                  |                         |              |
|                                    | White/Caucasian         | 78           |
|                                    | Black/African American  | 9            |
|                                    | Spanish/Hispanic/Latino | 8            |
|                                    | Asian                   | 7            |
|                                    | Pacific Islander        | 0            |
|                                    | Native American         | 2            |
|                                    | Other                   | 1            |

Note. \*) Total responses are >100% as consumers may select multiple options. GED = GED is a high school equivalency diploma. 'Some college' refers to initiated but incomplete degree.

**Table S1b.** Summary participant characteristics for Study 2 (USA: n=594), shown as percentages.

|                                    |                          | Total sample |
|------------------------------------|--------------------------|--------------|
| <b>Gender</b>                      |                          |              |
|                                    | Men                      | 50           |
|                                    | Women                    | 50           |
| <b>Age in years</b>                |                          |              |
|                                    | 18-39                    | 50           |
|                                    | 40-65                    | 50           |
| <b>Education level*</b>            |                          |              |
|                                    | Less than high school    | 1            |
|                                    | High school or GED       | 20           |
|                                    | Associate/technical      | 10           |
|                                    | Some college             | 16           |
|                                    | College                  | 33           |
|                                    | Postgraduate             | 19           |
| <b>Household member*</b>           |                          |              |
|                                    | No-one, I live alone     | 21           |
|                                    | Spouse/partner           | 56           |
|                                    | Child/ren aged under 18  | 34           |
|                                    | Child/ren aged over 18   | 11           |
|                                    | Parents                  | 13           |
|                                    | Housemate/s              | 3            |
|                                    | Other                    | 4            |
| <b>Household size</b>              |                          |              |
|                                    | 1 person                 | 21           |
|                                    | 2 people                 | 32           |
|                                    | 3 people                 | 20           |
|                                    | 4 people                 | 19           |
|                                    | 5 or more people         | 8            |
| <b>Employment</b>                  |                          |              |
|                                    | Working full-time        | 49           |
|                                    | Working part-time        | 13           |
|                                    | No-paid work/home duties | 7            |
|                                    | Student                  | 4            |
|                                    | Unemployed               | 13           |
|                                    | Retired                  | 13           |
|                                    | Other                    | 3            |
| <b>Household income (USD/year)</b> |                          |              |
|                                    | Less than \$30,000       | 20           |
|                                    | \$30,000 - \$59,999      | 21           |
|                                    | \$60,000 - \$79,999      | 14           |
|                                    | \$80,000 - \$99,999      | 16           |
|                                    | \$100,000 - \$149,000    | 15           |

|                              |    |
|------------------------------|----|
| \$150,000 or more            | 11 |
| Prefer not to answer         | 2  |
| <hr/>                        |    |
| <b>Ethnicity*</b>            |    |
| White/Caucasian              | 81 |
| Black/African American       | 10 |
| Spanish/Hispanic/Latino      | 6  |
| Asian                        | 5  |
| Pacific Islander             | 1  |
| Native American              | 2  |
| Middle Eastern/North African | 0  |
| Other                        | 1  |
| Prefer not to answer         | 0  |
| <hr/>                        |    |

Note. \*) Total responses are >100% as consumers may select multiple options. GED = GED is a high school equivalency diploma. 'Some college' refers to initiated but incomplete degree.

**Table S1c.** Summary participant characteristics for Study 3 (USA n=1522), shown as percentages.

|                                    |                          | Total sample |
|------------------------------------|--------------------------|--------------|
| <b>Gender</b>                      |                          |              |
|                                    | Men                      | 49           |
|                                    | Women                    | 51           |
| <b>Age in years</b>                |                          |              |
|                                    | 18-39                    | 49           |
|                                    | 40-65                    | 51           |
| <b>Education level*</b>            |                          |              |
|                                    | Less than high school    | 1            |
|                                    | High school or GED       | 17           |
|                                    | Associate/technical      | 9            |
|                                    | Some college             | 20           |
|                                    | College                  | 35           |
|                                    | Postgraduate             | 18           |
| <b>Household member*</b>           |                          |              |
|                                    | No-one, I live alone     | 20           |
|                                    | Spouse/partner           | 54           |
|                                    | Child/ren aged under 18  | 30           |
|                                    | Child/ren aged over 18   | 10           |
|                                    | Parents                  | 17           |
|                                    | Housemate/s              | 4            |
|                                    | Other                    | 4            |
| <b>Household size</b>              |                          |              |
|                                    | 1 person                 | 20           |
|                                    | 2 people                 | 35           |
|                                    | 3 people                 | 21           |
|                                    | 4 people                 | 15           |
|                                    | 5 or more people         | 9            |
| <b>Employment</b>                  |                          |              |
|                                    | Working full-time        | 52           |
|                                    | Working part-time        | 12           |
|                                    | No-paid work/home duties | 5            |
|                                    | Student                  | 6            |
|                                    | Unemployed               | 10           |
|                                    | Retired                  | 10           |
|                                    | Other                    | 2            |
|                                    | Disabled                 | 4            |
| <b>Household income (USD/year)</b> |                          |              |
|                                    | Less than \$30,000       | 19           |
|                                    | \$30,000 - \$59,999      | 25           |
|                                    | \$60,000 - \$79,999      | 14           |
|                                    | \$80,000 - \$99,999      | 15           |

|                              |    |
|------------------------------|----|
| \$100,000 - \$149,000        | 14 |
| \$150,000 or more            | 10 |
| Prefer not to answer         | 3  |
| <hr/>                        |    |
| <b>Ethnicity*</b>            |    |
| White/Caucasian              | 78 |
| Black/African American       | 8  |
| Spanish/Hispanic/Latino      | 9  |
| Asian                        | 7  |
| Pacific Islander             | 1  |
| Native American              | 1  |
| Middle Eastern/North African | 1  |
| Other                        | 1  |
| Prefer not to answer         | 1  |
| <hr/>                        |    |

Note. \*) Total responses are >100% as consumers may select multiple options. GED = GED is a high school equivalency diploma. 'Some college' refers to initiated but incomplete degree.

**Table S1d.** Summary participant characteristics for Study 4 (Australia n=758), shown as percentages.

| <b>Total sample</b>                |    |
|------------------------------------|----|
| <b>Gender</b>                      |    |
| Men                                | 49 |
| Women                              | 51 |
| <b>Age in years</b>                |    |
| 18-29                              | 23 |
| 30-39                              | 21 |
| 40-49                              | 20 |
| 50-59                              | 20 |
| 60-69                              | 16 |
| <b>Education level</b>             |    |
| Year 12 or less                    | 23 |
| Diploma or vocation certificate    | 27 |
| University degree                  | 50 |
| <b>Household member*</b>           |    |
| No-one, I live alone               | 18 |
| Spouse/partner                     | 62 |
| Child/ren aged under 18            | 30 |
| Child/ren aged over 18             | 17 |
| Parents                            | 9  |
| Housemate/s                        | 5  |
| Other                              | 2  |
| <b>Household size</b>              |    |
| 1 person                           | 19 |
| 2 people                           | 33 |
| 3 people                           | 20 |
| 4 people                           | 19 |
| 5 or more people                   | 8  |
| <b>Household income (AUD/year)</b> |    |
| Less than \$30,000                 | 10 |
| \$30,000 – \$54,999                | 15 |
| \$55,000 – \$84,999                | 17 |
| \$85,000 or more                   | 48 |
| Prefer not to answer               | 10 |

Note. \*) Total responses are >100% as consumers may select multiple options.

**Table S1e.** Summary participant characteristics for Study 5 (Australia n=1135), shown as percentages.

| <b>Total sample</b>                |    |
|------------------------------------|----|
| <b>Gender</b>                      |    |
| Men                                | 49 |
| Women                              | 51 |
| <b>Age in years</b>                |    |
| 25-29                              | 8  |
| 30-35                              | 15 |
| 36-40                              | 12 |
| 41-45                              | 13 |
| 46-50                              | 10 |
| 51-55                              | 10 |
| 56-60                              | 16 |
| 61-65                              | 17 |
| <b>Education level</b>             |    |
| Year 12 or less                    | 26 |
| Diploma or vocation certificate    | 28 |
| University degree                  | 45 |
| Other                              | 1  |
| <b>Household size</b>              |    |
| 1 person                           | 18 |
| 2 people                           | 35 |
| 3 people                           | 22 |
| 4 people                           | 18 |
| 5 or more people                   | 7  |
| <b>Employment</b>                  |    |
| Working full-time                  | 49 |
| Working part-time                  | 18 |
| No-paid work/home duties           | 13 |
| Student                            | 1  |
| Unemployed                         | 11 |
| Other                              | 8  |
| <b>Household income (AUD/year)</b> |    |
| Less than \$60,000                 | 26 |
| \$60,000-\$79,999                  | 16 |
| \$80,000-\$99,999                  | 14 |
| \$100,000-\$149,999                | 21 |
| \$150,000-\$199,999                | 9  |
| \$200,000 +                        | 7  |
| Prefer not to answer               | 7  |

**Table S1f.** Summary participant characteristics for Study 6 (UK n=1514), shown as percentages.

| <b>Total sample</b>                |    |
|------------------------------------|----|
| <b>Gender</b>                      |    |
| Men                                | 47 |
| Women                              | 53 |
| <b>Age in years</b>                |    |
| 18-39                              | 48 |
| 40-65                              | 52 |
| <b>Education level</b>             |    |
| Lower than high school             | 1  |
| GCSE's                             | 19 |
| A-levels                           | 16 |
| Associate/technical                | 6  |
| College                            | 32 |
| Postgraduate                       | 21 |
| Other                              | 3  |
| <b>Household member*</b>           |    |
| No-one, I live alone               | 19 |
| Spouse/partner                     | 60 |
| Child/ren aged under 18            | 31 |
| Child/ren aged over 18             | 11 |
| Parents                            | 13 |
| Housemate/s                        | 3  |
| Other                              | 2  |
| <b>Household size</b>              |    |
| 1 person                           | 19 |
| 2 people                           | 35 |
| 3 people                           | 21 |
| 4 people                           | 18 |
| 5 or more people                   | 6  |
| <b>Employment</b>                  |    |
| Working full-time                  | 55 |
| Working part-time                  | 16 |
| No-paid work/home duties           | 7  |
| Student                            | 4  |
| Unemployed                         | 8  |
| Retired                            | 7  |
| Other                              | 1  |
| Disabled                           | 2  |
| <b>Household income (GBP/year)</b> |    |
| Less than £10,000                  | 6  |
| £10,000-£19,999                    | 15 |
| £20,000-£29,999                    | 18 |
| £30,000-£39,999                    | 16 |
| £40,000-£49,999                    | 19 |



|                   |                      |    |
|-------------------|----------------------|----|
|                   | More than £50,000    | 22 |
|                   | Prefer not to answer | 4  |
| <hr/>             |                      |    |
| <b>Ethnicity*</b> |                      |    |
|                   | British              | 88 |
|                   | Chinese              | 2  |
|                   | Indian               | 2  |
|                   | Pakistani            | 1  |
|                   | Black African        | 1  |
|                   | Black Caribbean      | 1  |
|                   | Bangladeshi          | 1  |
|                   | Other                | 4  |
|                   | Prefer not to answer | 1  |
| <hr/>             |                      |    |

Note. \*) Total responses are >100% as consumers may select multiple options.

**Table S1g.** Summary participant characteristics for Study 7 (Germany n=1040), shown as percentages.

| <b>Total sample</b>                           |    |
|-----------------------------------------------|----|
| <b>Gender</b>                                 |    |
| Men                                           | 49 |
| Women                                         | 51 |
| <b>Age in years</b>                           |    |
| 18-39                                         | 50 |
| 40-65                                         | 50 |
| <b>Education level</b>                        |    |
| No secondary school certificate               | 0  |
| Secondary school certificate<br>(Hauptschule) | 3  |
| Secondary school certificate<br>(Realschule)  | 10 |
| Secondary school certificate<br>(Gymnasium)   | 13 |
| Completed vocational training                 | 38 |
| Polytechnic degree                            | 11 |
| University degree                             | 25 |
| No information                                | 0  |
| Other                                         | 0  |
| <b>Household member*</b>                      |    |
| No-one, I live alone                          | 29 |
| Spouse/partner                                | 55 |
| Child/ren aged under 18                       | 25 |
| Child/ren aged over 18                        | 7  |
| Parents                                       | 8  |
| Housemate/s                                   | 5  |
| Other                                         | 0  |
| <b>Household size</b>                         |    |
| 1 person                                      | 29 |
| 2 people                                      | 36 |
| 3 people                                      | 18 |
| 4 people                                      | 12 |
| 5 or more people                              | 4  |
| <b>Employment</b>                             |    |
| Working full-time                             | 57 |
| Working part-time                             | 13 |
| No-paid work/home duties                      | 5  |
| Student                                       | 8  |
| Unemployed                                    | 5  |
| Retired                                       | 8  |
| Other                                         | 1  |
| Disabled                                      | 3  |
| <b>Household income (Euro/year)</b>           |    |

|                      |    |
|----------------------|----|
| Less than €20,000    | 19 |
| €20,000 - €29,999    | 15 |
| €30,000-€39,999      | 16 |
| €40,000-€49,999      | 16 |
| More than €50,000    | 30 |
| Prefer not to answer | 4  |

---

Note. \*) Total responses are >100% as consumers may select multiple options.

**Table S1h.** Summary participant characteristics for Study 8 (Denmark n=780), shown as percentages.

| <b>Total sample</b>                      |    |
|------------------------------------------|----|
| <b>Gender</b>                            |    |
| Men                                      | 51 |
| Women                                    | 49 |
| <b>Age in years</b>                      |    |
| 18-29                                    | 21 |
| 30-39                                    | 18 |
| 40-49                                    | 21 |
| 50-59                                    | 21 |
| 60-69                                    | 20 |
| <b>Education level</b>                   |    |
| Primary school                           | 12 |
| High school                              | 13 |
| Skill school                             | 15 |
| Short higher education ( $\leq 2$ years) | 14 |
| Medium higher education (3-5 years)      | 30 |
| Long higher education ( $\geq 5$ years)  | 15 |
| Other                                    | 1  |
| <b>Household size</b>                    |    |
| 1 person                                 | 33 |
| 2 people                                 | 35 |
| 3 people                                 | 16 |
| 4 people                                 | 12 |
| 5 or more people                         | 5  |
| <b>Employment</b>                        |    |
| Working full-time                        | 46 |
| Working part-time                        | 9  |
| No-paid work/home duties                 | 3  |
| Student                                  | 11 |
| Unemployed                               | 12 |
| Other                                    | 19 |
| <b>Household income (DKK/year)</b>       |    |
| Less than DKK 200.000                    | 24 |
| DKK 200.001 – DKK 350.000                | 26 |
| DKK 350.001 – DKK 550.000                | 23 |
| DKK 550.001 – DKK 750.000                | 6  |
| DKK 750.001 – DKK 950.000                | 4  |
| DKK 950.001 or more                      | 3  |
| Prefer to not answer                     | 15 |

**Table S2.** F&B names in German (Study 7) and Danish (Study 8) used during data collection (right-most column).

| # | English name                                     | German or Danish name                                            |
|---|--------------------------------------------------|------------------------------------------------------------------|
| 7 | Bratwurst                                        | Bratwurst                                                        |
| 7 | Bread and cheese                                 | Brot und Käse                                                    |
| 7 | Chicken casserole                                | Hähnchen-Auflauf                                                 |
| 7 | Ham and potato soup                              | Kartoffelsuppe mit Schinkeneinlage                               |
| 7 | Meat loaf                                        | Hackbraten                                                       |
| 7 | Pasta with sundried tomato and garlic meat sauce | Nudeln mit sonnengetrockneten Tomaten und Knoblauch-Fleischsauce |
| 7 | Potato and lentil soup                           | Kartoffel-Linsen-Suppe                                           |
| 7 | Salsa black bean burger                          | Vegetarischer Burger mit Bratling aus Salsa und schwarzen Bohnen |
| 7 | Sauerkraut                                       | Sauerkraut                                                       |
| 7 | Spaghetti Bolognaise                             | Spaghetti Bolognese                                              |
| 7 | Spinach and artichoke pizza                      | Pizza mit Spinat und Artischocken                                |
| 7 | Stuffed bread with cheese and herbs              | Gefülltes Brot mit Kaese und Kräutern?                           |
| 7 | Vegan bratwurst                                  | Vegane Bratwurst                                                 |
| 7 | Vegetarian meat loaf                             | Vegetarischer Hackbrate                                          |
| 7 | Vegetarian pizza                                 | Vegetarische Pizza                                               |
| 7 | Wholemeal pasta salad with chicken               | Vollkorn Nudelsalat mit Hühnchen                                 |
| 8 | Banana                                           | Banan                                                            |
| 8 | Beef risole and potato salad                     | Hakkebøf med kartoffelsalat                                      |
| 8 | Beer                                             | Øl                                                               |
| 8 | Broth with vegetables and meat balls             | Klar suppe med grøntsager og kødboller                           |
| 8 | Cheese fondue                                    | Ostefondue                                                       |
| 8 | Coca Cola                                        | Coca Cola                                                        |
| 8 | Coffee                                           | Kaffe                                                            |
| 8 | Danish pastry                                    | Wienerbrød                                                       |
| 8 | French fries                                     | Pomfritter                                                       |
| 8 | French hotdog wo/ dressing                       | Pølsehorn                                                        |
| 8 | Fruit salad                                      | Frugtsalat                                                       |

|   |                                                         |
|---|---------------------------------------------------------|
| 8 | Ham and cheese quiche                                   |
| 8 | Herbal tea                                              |
| 8 | Kebab with green salad                                  |
| 8 | Milk and rice porridge                                  |
| 8 | Mixed grilled vegetables                                |
| 8 | Mixed nuts with dried fruits                            |
| 8 | Muesli with milk                                        |
| 8 | Orange juice                                            |
| 8 | Pasta salad with feta cheese                            |
| 8 | Porridge/Hot oatmeal                                    |
| 8 | Quiche with leek and bacon                              |
| 8 | Raw vegetables: tomato, cucumber, cauliflower, capsicum |
| 8 | Roasted nuts                                            |
| 8 | Ryebread with cheese                                    |
| 8 | Ryebread with sliced meat                               |
| 8 | Bun (Focaccia bread) with turkey, salad and dressing    |
| 8 | Softboiled egg with bread                               |
| 8 | Spaghetti Bolognese                                     |
| 8 | Sparkling water                                         |
| 8 | Spinach and tomato omelette                             |
| 8 | Stewed apples                                           |
| 8 | Thai meal                                               |
| 8 | Toasted ryebread with fried egg and avocado             |
| 8 | Vegetable juice                                         |
| 8 | Vegetarian pizza                                        |
| 8 | Warm liverpate with mushrooms                           |
| 8 | Water                                                   |
| 8 | White bread roll with ham and cheese                    |
| 8 | Wholemeal bread with jam                                |
| 8 | Skyr with muesli                                        |

|                                                   |
|---------------------------------------------------|
| Skinketærte med ost                               |
| Urtete                                            |
| Kebab med grøn salat                              |
| Risengrød                                         |
| Ovnstegte grøntsager                              |
| Nødde blanding med tørrede frugter                |
| Mysli med mælk                                    |
| Appelsinjuice                                     |
| Pastasalat med fetaost                            |
| Havregrød                                         |
| Porretærte med bacon                              |
| Rå grøntsager (tomat, agurk, blomkål, peberfrugt) |
| Ristede nødder                                    |
| Rugbrød med ost                                   |
| Rugbrød med rullepølse og sky                     |
| Focaccia bolle med kalkun, salat og dressing      |
| Blødkogt æg med brød                              |
| Spaghetti med kødsovs                             |
| Dansk vand (med brus)                             |
| Omelet med spinat og tomat                        |
| Æblegrød                                          |
| Thai-mad                                          |
| Ristet rugbrød med spejlæg og avocado             |
| Grøntsagsjuice                                    |
| Vegetar pizza                                     |
| Lun leverpostej med champignon og bacon           |
| Vand                                              |
| Rundstykke med skinke og ost                      |
| Grovbrød med syltetøj                             |
| Skyr med mysli                                    |

---

**Table S3.** List of F&B stimuli used in the research and key statistics following linear regression to establish the effect of FN on F&B liking/disliking. Shown are values for model goodness-of-fit ( $R^2$ ) (where all models are significant at  $p < 0.05$  unless indicated by 'ns' superscript) followed by regression coefficients (b) which are given with corresponding 95% confidence intervals (CI) as lower and upper bounds. The second to last column shows the intercept value for the linear regression (a), while the final column shows average degree of liking/disliking across all participants in the study (1='dislike extremely, 9='like extremely'). F&B names are shown by study and sorted by regression coefficient value. Grey shading used to differentiate between studies.

| Study | F&B name*                         | $R^2$ | b      | b<br>95%<br>CI lower | b<br>95%<br>CI upper | a   | Average<br>liking |
|-------|-----------------------------------|-------|--------|----------------------|----------------------|-----|-------------------|
| 1     | Sushi                             | 0.93  | -0.117 | -0.128               | -0.106               | 9.2 | 5.7               |
| 1     | Steamed mussels                   | 0.90  | -0.097 | -0.108               | -0.085               | 8.2 | 5.3               |
| 1     | Fried oysters                     | 0.81  | -0.091 | -0.106               | -0.075               | 8.0 | 5.3               |
| 1     | Salsa poached eggs                | 0.86  | -0.086 | -0.098               | -0.074               | 7.5 | 5.0               |
| 1     | Refried beans                     | 0.79  | -0.078 | -0.092               | -0.065               | 8.6 | 6.3               |
| 1     | Three cheese and chorizo omelette | 0.80  | -0.078 | -0.091               | -0.064               | 8.7 | 6.4               |
| 1     | Hot pastrami sandwich             | 0.72  | -0.077 | -0.093               | -0.060               | 8.8 | 6.6               |
| 1     | Eggs Benedict                     | 0.87  | -0.075 | -0.086               | -0.065               | 8.5 | 6.3               |
| 1     | Kidney bean salad                 | 0.80  | -0.074 | -0.087               | -0.062               | 7.1 | 5.0               |
| 1     | Vegetable and bean casserole      | 0.76  | -0.066 | -0.079               | -0.053               | 7.8 | 5.9               |
| 1     | Baked salmon                      | 0.72  | -0.065 | -0.080               | -0.051               | 9.0 | 7.1               |
| 1     | Pickled beet and onion salad      | 0.75  | -0.061 | -0.074               | -0.049               | 5.8 | 4.1               |
| 1     | Breakfast burrito                 | 0.83  | -0.060 | -0.070               | -0.050               | 8.7 | 6.9               |
| 1     | Baked rabbit                      | 0.74  | -0.054 | -0.065               | -0.042               | 5.6 | 4.0               |
| 1     | Liver pate                        | 0.67  | -0.053 | -0.066               | -0.040               | 5.0 | 3.5               |
| 1     | Tripe and onions                  | 0.74  | -0.052 | -0.063               | -0.041               | 5.0 | 3.5               |
| 1     | Mixed green salad                 | 0.74  | -0.049 | -0.059               | -0.039               | 8.8 | 7.3               |
| 1     | Stewed prunes                     | 0.66  | -0.045 | -0.056               | -0.034               | 4.6 | 3.4               |
| 1     | Tuna salad sandwich               | 0.42  | -0.039 | -0.056               | -0.023               | 7.8 | 6.7               |
| 1     | Pickled pigs feet                 | 0.58  | -0.036 | -0.047               | -0.025               | 3.7 | 2.7               |

|   |                                                                |                    |        |        |        |     |     |
|---|----------------------------------------------------------------|--------------------|--------|--------|--------|-----|-----|
| 1 | Chilli cheese dog                                              | 0.40               | -0.035 | -0.050 | -0.020 | 7.6 | 6.6 |
| 1 | Cereal/muesli                                                  | 0.48               | -0.026 | -0.036 | -0.017 | 7.2 | 6.4 |
| 1 | Blueberry muffins                                              | 0.28               | -0.022 | -0.034 | -0.010 | 8.2 | 7.5 |
| 1 | Instant noodles <sup>2</sup>                                   | 0.27               | -0.018 | -0.028 | -0.008 | 6.7 | 6.2 |
| 1 | Lasagna                                                        | 0.27               | -0.014 | -0.022 | -0.006 | 8.4 | 8.0 |
| 1 | Chicken noodle soup                                            | 0.10 <sup>ns</sup> | -0.008 | -0.017 | 0.000  | 7.6 | 7.4 |
| 2 | Shrimp taco                                                    | 0.68               | -0.087 | -0.108 | -0.067 | 8.7 | 6.0 |
| 2 | Fried mushrooms                                                | 0.62               | -0.080 | -0.101 | -0.058 | 8.4 | 6.0 |
| 2 | Root vegetable stew                                            | 0.71               | -0.080 | -0.097 | -0.062 | 7.6 | 5.1 |
| 2 | Seafood chowder                                                | 0.57               | -0.073 | -0.095 | -0.051 | 8.0 | 5.7 |
| 2 | Corn chowder                                                   | 0.63               | -0.069 | -0.087 | -0.051 | 7.9 | 5.8 |
| 2 | Lamb stew                                                      | 0.64               | -0.065 | -0.081 | -0.048 | 7.1 | 5.1 |
| 2 | Lentil and beet soup                                           | 0.57               | -0.063 | -0.082 | -0.045 | 6.5 | 4.6 |
| 2 | Cream of mushroom soup                                         | 0.52               | -0.061 | -0.081 | -0.041 | 7.6 | 5.7 |
| 2 | Burger with patty from 100% plant-based meat substitute        | 0.44               | -0.055 | -0.076 | -0.034 | 6.6 | 5.0 |
| 2 | Veal burger                                                    | 0.52               | -0.053 | -0.070 | -0.036 | 6.7 | 4.9 |
| 2 | Impossible™ burger (from plants)                               | 0.40               | -0.052 | -0.074 | -0.030 | 6.4 | 5.0 |
| 2 | Lamb chops                                                     | 0.41               | -0.047 | -0.067 | -0.028 | 7.1 | 5.6 |
| 2 | Burger with patty from ground beef and vegetable blend (50:50) | 0.31               | -0.042 | -0.063 | -0.021 | 6.6 | 5.4 |
| 2 | Fried liver                                                    | 0.35               | -0.041 | -0.060 | -0.022 | 4.9 | 3.9 |
| 2 | All-American beef stew                                         | 0.22               | -0.032 | -0.052 | -0.011 | 8.0 | 7.0 |
| 2 | Chicken sandwich                                               | 0.12               | -0.016 | -0.031 | -0.001 | 8.2 | 7.7 |
| 2 | Fried eggs                                                     | 0.07 <sup>ns</sup> | -0.014 | -0.032 | 0.004  | 7.4 | 7.0 |
| 2 | Burger with patty from 100% ground beef                        | 0.05 <sup>ns</sup> | -0.007 | -0.019 | 0.004  | 8.0 | 7.7 |
| 3 | Spicy enchiladas                                               | 0.86               | -0.103 | -0.114 | -0.091 | 9.5 | 5.5 |
| 3 | Vegetable chilli stir-fry                                      | 0.78               | -0.095 | -0.109 | -0.082 | 8.8 | 5.0 |
| 3 | Seafood pizza                                                  | 0.83               | -0.092 | -0.103 | -0.081 | 7.6 | 4.0 |
| 3 | Smoothie with avocado and almond milk <sup>B</sup>             | 0.78               | -0.090 | -0.103 | -0.077 | 7.8 | 4.3 |
| 3 | Chai latte <sup>B</sup>                                        | 0.78               | -0.087 | -0.099 | -0.074 | 7.8 | 4.4 |
| 3 | Kale, cucumber and apple juice <sup>B</sup>                    | 0.79               | -0.087 | -0.099 | -0.075 | 7.7 | 4.3 |



|   |                                                     |                    |        |        |        |      |     |
|---|-----------------------------------------------------|--------------------|--------|--------|--------|------|-----|
| 3 | Stuffed crust pizza with cheese, tomato and shrimp  | 0.81               | -0.086 | -0.097 | -0.075 | 8.2  | 4.8 |
| 3 | Lasagna made with meat substitutes from pea protein | 0.78               | -0.085 | -0.097 | -0.073 | 7.4  | 4.1 |
| 3 | Lentil and broccoli "meat balls"                    | 0.75               | -0.082 | -0.095 | -0.070 | 7.3  | 4.1 |
| 3 | Vegan "meat balls" made with soy protein            | 0.79               | -0.082 | -0.093 | -0.071 | 7.2  | 4.0 |
| 3 | Granola bar with coconut and chia seeds             | 0.63               | -0.080 | -0.097 | -0.064 | 8.2  | 5.1 |
| 3 | Oat milk with cocoa flavour <sup>B</sup>            | 0.74               | -0.080 | -0.092 | -0.067 | 7.5  | 4.4 |
| 3 | Baked salmon <sup>2</sup>                           | 0.64               | -0.077 | -0.092 | -0.061 | 8.7  | 5.8 |
| 3 | Kombucha with ginger*                               | 0.77               | -0.077 | -0.088 | -0.066 | 6.7  | 3.7 |
| 3 | Onion and beet salad                                | 0.74               | -0.077 | -0.089 | -0.065 | 6.9  | 3.9 |
| 3 | Apple, orange and kale juice <sup>B</sup>           | 0.75               | -0.076 | -0.087 | -0.064 | 8.1  | 5.1 |
| 3 | Wholemeal pasta with garlic and tomato sauce        | 0.65               | -0.074 | -0.088 | -0.059 | 8.8  | 5.9 |
| 3 | Breakfast burrito                                   | 0.74               | -0.073 | -0.085 | -0.062 | 9.0  | 6.2 |
| 3 | Vegetable pot pie                                   | 0.63               | -0.071 | -0.085 | -0.056 | 8.2  | 5.4 |
| 3 | Zucchini brownie                                    | 0.67               | -0.067 | -0.079 | -0.054 | 7.1  | 4.5 |
| 3 | Hot coffee <sup>B</sup>                             | 0.55               | -0.063 | -0.079 | -0.048 | 8.8  | 6.3 |
| 3 | Club soda*                                          | 0.66               | -0.057 | -0.068 | -0.046 | 6.9  | 4.7 |
| 3 | Fish fingers                                        | 0.52               | -0.052 | -0.065 | -0.038 | 7.3  | 5.3 |
| 3 | Tossed green salad with red onions                  | 0.50               | -0.052 | -0.066 | -0.038 | 8.3  | 6.3 |
| 3 | Granola bar with insect flour                       | 0.53               | -0.050 | -0.063 | -0.037 | 5.0  | 3.1 |
| 3 | Strawberry flavoured milk (from cows)               | 0.41               | -0.043 | -0.056 | -0.029 | 7.1  | 5.4 |
| 3 | Strawberry and banana smoothie                      | 0.37               | -0.037 | -0.050 | -0.024 | 8.3  | 6.8 |
| 3 | Beef lasagna                                        | 0.26               | -0.027 | -0.039 | -0.015 | 8.4  | 7.3 |
| 3 | Spaghetti with tomato sauce                         | 0.24               | -0.015 | -0.022 | -0.008 | 8.2  | 7.6 |
| 3 | Chocolate cake                                      | 0.01 <sup>ns</sup> | -0.002 | -0.012 | 0.007  | 7.9  | 7.8 |
| 4 | Sushi                                               | 0.83               | -0.128 | -0.144 | -0.112 | 10.2 | 6.3 |
| 4 | Thai green curry                                    | 0.76               | -0.123 | -0.141 | -0.104 | 10.5 | 6.9 |
| 4 | Prawn risotto                                       | 0.73               | -0.109 | -0.126 | -0.091 | 9.2  | 6.0 |
| 4 | Bagel with avocado and cream cheese                 | 0.58               | -0.090 | -0.111 | -0.069 | 9.0  | 6.3 |
| 4 | Spinach and tomato omelette                         | 0.48               | -0.079 | -0.101 | -0.057 | 9.2  | 6.7 |
| 4 | Vegetable and bean hot pot                          | 0.50               | -0.072 | -0.091 | -0.053 | 8.5  | 6.5 |

|   |                                   |                    |        |        |        |     |     |
|---|-----------------------------------|--------------------|--------|--------|--------|-----|-----|
| 4 | Apple and kale juice <sup>B</sup> | 0.52               | -0.066 | -0.082 | -0.049 | 7.1 | 5.3 |
| 4 | Ham and tomato muffin             | 0.43               | -0.064 | -0.084 | -0.044 | 8.2 | 6.3 |
| 4 | Caesar salad                      | 0.43               | -0.063 | -0.082 | -0.043 | 8.8 | 6.9 |
| 4 | Vegetarian sausages               | 0.47               | -0.062 | -0.080 | -0.045 | 8.6 | 5.1 |
| 4 | Frozen yoghurt                    | 0.47               | -0.058 | -0.074 | -0.041 | 7.9 | 6.2 |
| 4 | Raw snack vegetables              | 0.39               | -0.057 | -0.076 | -0.038 | 8.0 | 6.2 |
| 4 | Egg mayonnaise sandwich           | 0.30               | -0.055 | -0.078 | -0.033 | 8.1 | 6.4 |
| 4 | Mixed green salad                 | 0.47               | -0.055 | -0.070 | -0.039 | 8.6 | 7.0 |
| 4 | Yoghurt                           | 0.38               | -0.055 | -0.074 | -0.037 | 8.8 | 7.1 |
| 4 | Hot coffee <sup>B</sup>           | 0.23               | -0.052 | -0.078 | -0.026 | 8.8 | 7.1 |
| 4 | Camomile tea <sup>B</sup>         | 0.33               | -0.051 | -0.070 | -0.031 | 6.6 | 5.2 |
| 4 | Mixed raw nuts                    | 0.29               | -0.051 | -0.072 | -0.030 | 8.4 | 6.8 |
| 4 | Iced coffee <sup>B</sup>          | 0.28               | -0.050 | -0.072 | -0.029 | 7.4 | 6.0 |
| 4 | Croissant                         | 0.35               | -0.049 | -0.067 | -0.031 | 8.6 | 7.1 |
| 4 | Cheese and vegemite sandwich      | 0.17               | -0.042 | -0.067 | -0.017 | 7.3 | 6.0 |
| 4 | Scrambled eggs                    | 0.18               | -0.041 | -0.065 | -0.018 | 8.8 | 7.4 |
| 4 | Sparkling water <sup>B</sup>      | 0.24               | -0.037 | -0.055 | -0.019 | 6.8 | 5.7 |
| 4 | Peanut butter sandwich            | 0.14               | -0.035 | -0.059 | -0.011 | 7.4 | 6.4 |
| 4 | Ham and cheese muffin             | 0.16               | -0.033 | -0.053 | -0.012 | 7.6 | 6.6 |
| 4 | Porridge/hot oatmeal              | 0.18               | -0.033 | -0.052 | -0.015 | 7.2 | 6.2 |
| 4 | Fresh fruit salad                 | 0.33               | -0.031 | -0.042 | -0.019 | 8.4 | 7.4 |
| 4 | Instant noodles                   | 0.18               | -0.031 | -0.048 | -0.013 | 6.8 | 6.0 |
| 4 | Lemon mousse tart                 | 0.11               | -0.028 | -0.050 | -0.006 | 7.2 | 6.4 |
| 4 | Spaghetti Bolognese               | 0.15               | -0.027 | -0.045 | -0.010 | 8.5 | 7.5 |
| 4 | Banana                            | 0.11               | -0.026 | -0.047 | -0.006 | 7.9 | 7.1 |
| 4 | Cereal/muesli                     | 0.09               | -0.023 | -0.042 | -0.003 | 7.5 | 6.9 |
| 4 | Cold sliced meats                 | 0.11               | -0.022 | -0.039 | -0.005 | 7.6 | 6.8 |
| 4 | Ham and cheese sandwich           | 0.07               | -0.018 | -0.036 | -0.001 | 7.7 | 7.1 |
| 4 | Fruit juice <sup>B</sup>          | 0.07               | -0.014 | -0.028 | 0.000  | 7.6 | 7.1 |
| 4 | Water <sup>B</sup>                | 0.05 <sup>ns</sup> | -0.014 | -0.030 | 0.002  | 8.3 | 7.8 |

|   |                                 |                    |        |        |        |      |     |
|---|---------------------------------|--------------------|--------|--------|--------|------|-----|
| 4 | Ham and cheese toasted sandwich | 0.00 <sup>ns</sup> | -0.004 | -0.020 | 0.012  | 7.5  | 7.2 |
| 4 | Hash browns                     | 0.00 <sup>ns</sup> | -0.004 | -0.022 | 0.014  | 7.1  | 6.9 |
| 4 | Sausage rolls                   | 0.00 <sup>ns</sup> | 0.000  | -0.016 | 0.016  | 6.9  | 6.8 |
| 4 | Buttered toast                  | 0.00 <sup>ns</sup> | 0.001  | -0.012 | 0.015  | 7.2  | 7.2 |
| 4 | Meat pie                        | 0.01 <sup>ns</sup> | 0.007  | -0.009 | 0.023  | 6.6  | 6.7 |
| 4 | Milkshake <sup>B</sup>          | 0.06 <sup>ns</sup> | 0.012  | -0.001 | 0.024  | 6.5  | 6.8 |
| 5 | Thai green curry                | 0.88               | -0.120 | -0.132 | -0.108 | 10.1 | 5.4 |
| 5 | Sushi                           | 0.76               | -0.113 | -0.129 | -0.096 | 9.5  | 5.0 |
| 5 | Prawn risotto                   | 0.86               | -0.104 | -0.115 | -0.093 | 9.3  | 5.2 |
| 5 | Blue-vein cheese                | 0.83               | -0.091 | -0.102 | -0.081 | 7.7  | 4.1 |
| 5 | Spicy/hot chilli con carne      | 0.74               | -0.090 | -0.104 | -0.076 | 8.4  | 4.9 |
| 5 | Tuna steak                      | 0.79               | -0.086 | -0.097 | -0.074 | 8.4  | 5.0 |
| 5 | Strong mustard                  | 0.78               | -0.084 | -0.096 | -0.072 | 8.0  | 4.7 |
| 5 | Rabbit ragu                     | 0.85               | -0.082 | -0.091 | -0.072 | 6.9  | 3.7 |
| 5 | Smoked cheese                   | 0.77               | -0.075 | -0.086 | -0.065 | 8.2  | 5.3 |
| 5 | Pickled herring                 | 0.74               | -0.064 | -0.074 | -0.054 | 5.6  | 3.1 |
| 5 | Brussel sprouts                 | 0.48               | -0.053 | -0.068 | -0.038 | 7.1  | 5.0 |
| 5 | Dark chocolate                  | 0.56               | -0.040 | -0.050 | -0.031 | 8.1  | 6.5 |
| 5 | Mild cheese                     | 0.18               | -0.026 | -0.040 | -0.011 | 7.7  | 6.7 |
| 5 | Garlic bread                    | 0.11               | -0.020 | -0.034 | -0.005 | 8.3  | 7.5 |
| 5 | White rice                      | 0.18               | -0.020 | -0.031 | -0.009 | 7.5  | 6.7 |
| 5 | Apple                           | 0.10               | -0.011 | -0.020 | -0.003 | 7.6  | 7.2 |
| 5 | Chicken breast                  | 0.01 <sup>ns</sup> | -0.006 | -0.022 | 0.009  | 7.7  | 7.5 |
| 5 | White bread                     | 0.20               | 0.018  | 0.009  | 0.028  | 6.0  | 6.7 |
| 6 | Thai green chicken curry        | 0.91               | -0.132 | -0.143 | -0.122 | 10.1 | 4.8 |
| 6 | Chilli chicken stir-fry         | 0.86               | -0.122 | -0.135 | -0.109 | 10.0 | 5.2 |
| 6 | Chilli con carne                | 0.86               | -0.112 | -0.124 | -0.100 | 9.8  | 5.4 |
| 6 | Mild Indian curry (vegetarian)  | 0.83               | -0.112 | -0.126 | -0.099 | 9.5  | 5.1 |
| 6 | Chicken korma                   | 0.76               | -0.109 | -0.125 | -0.093 | 9.8  | 5.4 |
| 6 | Spicy lamb meatballs            | 0.83               | -0.106 | -0.118 | -0.093 | 9.1  | 4.9 |

|   |                                                  |      |        |        |        |      |     |
|---|--------------------------------------------------|------|--------|--------|--------|------|-----|
| 6 | Lamb kebabs                                      | 0.78 | -0.099 | -0.113 | -0.086 | 9.3  | 5.4 |
| 6 | Chickpea salad (spicy)                           | 0.80 | -0.095 | -0.107 | -0.082 | 7.9  | 4.2 |
| 6 | Chicken fried rice                               | 0.53 | -0.076 | -0.095 | -0.057 | 9.3  | 6.3 |
| 6 | Tuna pasta                                       | 0.54 | -0.074 | -0.092 | -0.056 | 8.1  | 5.2 |
| 6 | Soy milk <sup>B</sup>                            | 0.72 | -0.071 | -0.083 | -0.059 | 6.4  | 3.5 |
| 6 | Sardines on toast                                | 0.64 | -0.070 | -0.084 | -0.056 | 6.6  | 3.8 |
| 6 | Crackers with salmon pate                        | 0.48 | -0.068 | -0.086 | -0.049 | 7.1  | 4.4 |
| 6 | Beef and beetroot sausages                       | 0.67 | -0.066 | -0.078 | -0.054 | 6.7  | 4.1 |
| 6 | Mixed green salad                                | 0.49 | -0.065 | -0.083 | -0.048 | 8.5  | 5.9 |
| 6 | Tuna steak                                       | 0.49 | -0.065 | -0.082 | -0.047 | 8.0  | 5.5 |
| 6 | Dairy-free yoghurt                               | 0.51 | -0.054 | -0.068 | -0.040 | 6.5  | 4.4 |
| 6 | Savoury mince                                    | 0.35 | -0.050 | -0.068 | -0.032 | 8.1  | 6.1 |
| 6 | Pork and potato sausages                         | 0.27 | -0.036 | -0.051 | -0.020 | 6.9  | 5.4 |
| 6 | Chicken casserole                                | 0.25 | -0.034 | -0.050 | -0.018 | 8.1  | 6.7 |
| 7 | Chilli chicken stir-fry                          | 0.78 | -0.116 | -0.134 | -0.099 | 10.0 | 5.7 |
| 7 | Pasta with sundried tomato and garlic meat sauce | 0.64 | -0.095 | -0.115 | -0.076 | 9.3  | 5.8 |
| 7 | Wholemeal pasta salad with chicken               | 0.68 | -0.094 | -0.112 | -0.076 | 8.5  | 5.0 |
| 7 | Chicken and rice salad with spicy mayonnaise     | 0.71 | -0.093 | -0.109 | -0.076 | 8.4  | 5.0 |
| 7 | Spinach and artichoke pizza                      | 0.66 | -0.091 | -0.109 | -0.073 | 7.8  | 4.4 |
| 7 | Salsa black bean burger                          | 0.68 | -0.087 | -0.103 | -0.071 | 6.7  | 3.5 |
| 7 | Vegetarian pizza                                 | 0.59 | -0.086 | -0.105 | -0.066 | 7.8  | 4.6 |
| 7 | Stuffed bread with cheese and herbs              | 0.35 | -0.068 | -0.093 | -0.042 | 8.6  | 6.1 |
| 7 | Vegetarian meat loaf                             | 0.52 | -0.065 | -0.082 | -0.048 | 5.8  | 3.4 |
| 7 | Ham and potato soup                              | 0.34 | -0.063 | -0.087 | -0.039 | 8.2  | 5.8 |
| 7 | Chicken casserole                                | 0.40 | -0.058 | -0.077 | -0.038 | 8.3  | 6.2 |
| 7 | Potato and lentil soup                           | 0.35 | -0.056 | -0.077 | -0.035 | 8.1  | 6.0 |
| 7 | Spicy red cabbage                                | 0.37 | -0.056 | -0.075 | -0.036 | 7.2  | 5.2 |
| 7 | Vegan bratwurst                                  | 0.32 | -0.051 | -0.072 | -0.030 | 5.2  | 3.3 |
| 7 | Bread and cheese                                 | 0.23 | -0.047 | -0.070 | -0.023 | 8.8  | 7.1 |
| 7 | Herring fillet in tomato sauce                   | 0.22 | -0.044 | -0.066 | -0.021 | 6.8  | 5.2 |

|   |                                                      |                    |        |        |        |      |     |
|---|------------------------------------------------------|--------------------|--------|--------|--------|------|-----|
| 7 | Spaghetti Bolognaise                                 | 0.17               | -0.037 | -0.059 | -0.015 | 8.8  | 7.4 |
| 7 | Meat loaf                                            | 0.08               | -0.023 | -0.044 | -0.002 | 7.7  | 6.8 |
| 7 | Sauerkraut                                           | 0.04 <sup>ns</sup> | -0.014 | -0.034 | 0.006  | 6.9  | 6.3 |
| 7 | Bratwurst                                            | 0.00 <sup>ns</sup> | -0.002 | -0.018 | 0.013  | 7.2  | 7.1 |
| 8 | Sushi                                                | 0.69               | -0.121 | -0.143 | -0.100 | 9.4  | 4.7 |
| 8 | Thai meal                                            | 0.73               | -0.106 | -0.123 | -0.089 | 10.2 | 6.1 |
| 8 | Kebab and green salad                                | 0.49               | -0.082 | -0.104 | -0.059 | 9.7  | 6.6 |
| 8 | Toasted ryebread with fried egg and avocado          | 0.40               | -0.081 | -0.108 | -0.055 | 9.5  | 6.3 |
| 8 | Vegetarian pizza                                     | 0.53               | -0.078 | -0.098 | -0.059 | 8.1  | 5.1 |
| 8 | Pasta salad with feta cheese                         | 0.39               | -0.072 | -0.096 | -0.048 | 8.9  | 6.1 |
| 8 | Roasted nuts                                         | 0.38               | -0.072 | -0.097 | -0.048 | 9.4  | 6.6 |
| 8 | Mixed nuts with dried fruits                         | 0.37               | -0.070 | -0.094 | -0.045 | 8.7  | 6.0 |
| 8 | Spinach and tomato omelette                          | 0.30               | -0.068 | -0.095 | -0.040 | 9.4  | 6.8 |
| 8 | Vegetable juice <sup>B</sup>                         | 0.44               | -0.067 | -0.087 | -0.047 | 7.4  | 4.9 |
| 8 | Herbal tea <sup>B</sup>                              | 0.42               | -0.063 | -0.083 | -0.043 | 6.9  | 4.5 |
| 8 | Cheese fondue                                        | 0.30               | -0.061 | -0.086 | -0.036 | 7.1  | 4.8 |
| 8 | Salmon and green salad                               | 0.26               | -0.058 | -0.084 | -0.032 | 8.8  | 6.6 |
| 8 | Beer <sup>B</sup>                                    | 0.30               | -0.054 | -0.076 | -0.032 | 7.7  | 5.6 |
| 8 | Sparkling water <sup>B</sup>                         | 0.21               | -0.054 | -0.082 | -0.026 | 7.7  | 5.6 |
| 8 | Mixed grilled vegetables                             | 0.26               | -0.052 | -0.076 | -0.028 | 9.4  | 7.4 |
| 8 | Stewed apples                                        | 0.25               | -0.052 | -0.075 | -0.028 | 7.8  | 5.8 |
| 8 | Skyr with muesli                                     | 0.24               | -0.050 | -0.073 | -0.026 | 7.0  | 5.1 |
| 8 | Bun (Focaccia bread) with turkey, salad and dressing | 0.29               | -0.049 | -0.069 | -0.028 | 8.8  | 6.9 |
| 8 | Ham and cheese quiche                                | 0.26               | -0.048 | -0.070 | -0.026 | 8.8  | 6.9 |
| 8 | Quiche with leek and bacon                           | 0.22               | -0.043 | -0.064 | -0.021 | 8.7  | 7.1 |
| 8 | Muesli with milk                                     | 0.17               | -0.042 | -0.067 | -0.017 | 7.1  | 5.4 |
| 8 | White bread roll with ham and cheese                 | 0.15               | -0.040 | -0.066 | -0.014 | 8.3  | 6.8 |
| 8 | Fish cake on bread                                   | 0.18               | -0.038 | -0.059 | -0.016 | 8.5  | 7.0 |
| 8 | Wholemeal bread with jam                             | 0.16               | -0.038 | -0.062 | -0.014 | 7.9  | 6.4 |
| 8 | Ryebread with sliced meat                            | 0.13               | -0.036 | -0.062 | -0.011 | 7.7  | 6.3 |

|   |                                                         |                    |        |        |        |     |     |
|---|---------------------------------------------------------|--------------------|--------|--------|--------|-----|-----|
| 8 | Ryebread with cheese                                    | 0.15               | -0.033 | -0.053 | -0.012 | 8.2 | 7.0 |
| 8 | Beef rissole and potato salad                           | 0.16               | -0.031 | -0.049 | -0.012 | 8.7 | 7.5 |
| 8 | Raw vegetables: tomato, cucumber, cauliflower, capsicum | 0.19               | -0.030 | -0.047 | -0.014 | 8.7 | 7.5 |
| 8 | Water <sup>B</sup>                                      | 0.13               | -0.030 | -0.051 | -0.010 | 9.0 | 7.8 |
| 8 | Coffee <sup>B</sup>                                     | 0.09               | -0.026 | -0.047 | -0.004 | 7.7 | 6.7 |
| 8 | Warm liver pate with mushrooms                          | 0.12               | -0.025 | -0.043 | -0.006 | 8.3 | 7.4 |
| 8 | Fruit salad                                             | 0.10               | -0.024 | -0.043 | -0.005 | 8.3 | 7.4 |
| 8 | Porridge/Hot oatmeal                                    | 0.08               | -0.024 | -0.046 | -0.003 | 6.5 | 5.6 |
| 8 | Broth with vegetables and meat balls                    | 0.11               | -0.022 | -0.038 | -0.005 | 8.0 | 7.2 |
| 8 | Soft boiled egg with bread                              | 0.07               | -0.020 | -0.039 | 0.000  | 8.3 | 7.5 |
| 8 | Banana                                                  | 0.05 <sup>ns</sup> | -0.016 | -0.034 | 0.002  | 8.2 | 7.5 |
| 8 | Ryebread with mackerel in tomato sauce                  | 0.04 <sup>ns</sup> | -0.016 | -0.039 | 0.007  | 7.4 | 6.8 |
| 8 | Milk and rice porridge                                  | 0.03 <sup>ns</sup> | -0.014 | -0.035 | 0.006  | 7.3 | 6.7 |
| 8 | Spaghetti Bolognese                                     | 0.08               | -0.013 | -0.025 | -0.001 | 8.5 | 8.0 |
| 8 | Orange juice <sup>B</sup>                               | 0.01 <sup>ns</sup> | -0.005 | -0.019 | 0.009  | 7.7 | 7.5 |
| 8 | Danish pastry                                           | 0.00               | -0.002 | -0.024 | 0.020  | 6.8 | 6.7 |
| 8 | French fries                                            | 0.01 <sup>ns</sup> | 0.005  | -0.012 | 0.021  | 7.4 | 7.6 |
| 8 | Coca Cola <sup>B</sup>                                  | 0.06 <sup>ns</sup> | 0.016  | -0.001 | 0.033  | 6.0 | 6.6 |
| 8 | French hotdog w/o dressing                              | 0.09               | 0.017  | 0.002  | 0.032  | 6.3 | 7.0 |

Notes. \*) B superscript indicates that the stimulus is a beverage. For Studies 7 and 8, refer to Part 2 of Supplementary Material for the stimuli wordings in original languages.

**Figure S1.** Distribution of summed FN scores for Study 1 to show that the number of observations underpinning each FN value was highly variable since there are more participants with FN scores in the mid-range than at the extremes of the scale range. This is particularly true for participants with high levels of FN.

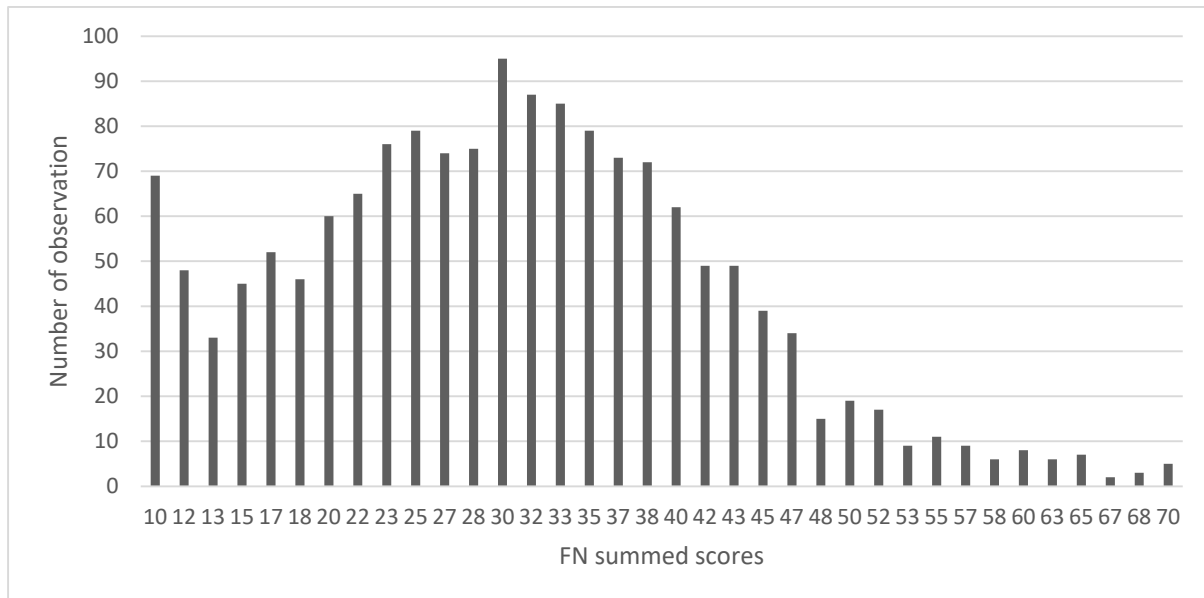

**Table S4.** Overview of the six groups of F&B names with variable impact of FN on liking. The number of F&B names in each group is given together with summary statistics for the regression coefficients that were input to the discretization procedure. The names given to each group are qualitative labels to express differences in the direction and strength of the relative relationship between FN and liking.

| <b>Group name for effect of FN on liking</b> | <b>Nbr. F&amp;B names</b> | <b>Reg. Coeff. Mean (HSD)</b> | <b>Reg. Coeff. 95% Conf. Interval</b> |        |
|----------------------------------------------|---------------------------|-------------------------------|---------------------------------------|--------|
| Neg. – Very High                             | 18                        | -0.114 <sup>F</sup>           | -0.132                                | -0.099 |
| Neg. – High                                  | 54                        | -0.082 <sup>E</sup>           | -0.097                                | -0.071 |
| Neg. – Medium                                | 64                        | -0.058 <sup>D</sup>           | -0.070                                | -0.048 |
| Neg. – Low                                   | 34                        | -0.038 <sup>C</sup>           | -0.047                                | -0.030 |
| Neg. – Very Low                              | 27                        | -0.020 <sup>B</sup>           | -0.028                                | -0.002 |
| Pos. – Very Low                              | 2                         | 0.018 <sup>A</sup>            | 0.017                                 | 0.018  |

*Notes.* Neg = negative, Pos = positive. The mean values for regression coefficients are shown with results from Tukey's HSD, where groups which share a letter are not significantly different at the 5% level.



**Figure S2.** Illustration of the variable effect of average F&B liking as a function of FN: a) a significant and weak positive linkage between FN and liking - 'white bread' (AU), b) a significant and weak negative linkage between FN and liking from the "very low" group - 'blueberry muffin' (US), and c) a significant and strong negative linkage between FN and liking from the "high" group - 'vegetarian pizza' (DE). F&B liking measured on 9-pt scale from 1= 'dislike extremely' to 9='like extremely.' Theoretical range for FN was 10 to 70, where higher values correspond to higher levels of FN. The number of respondents contributing to each point vary as dictated by the shape of the underlying FN distributions.

(A)

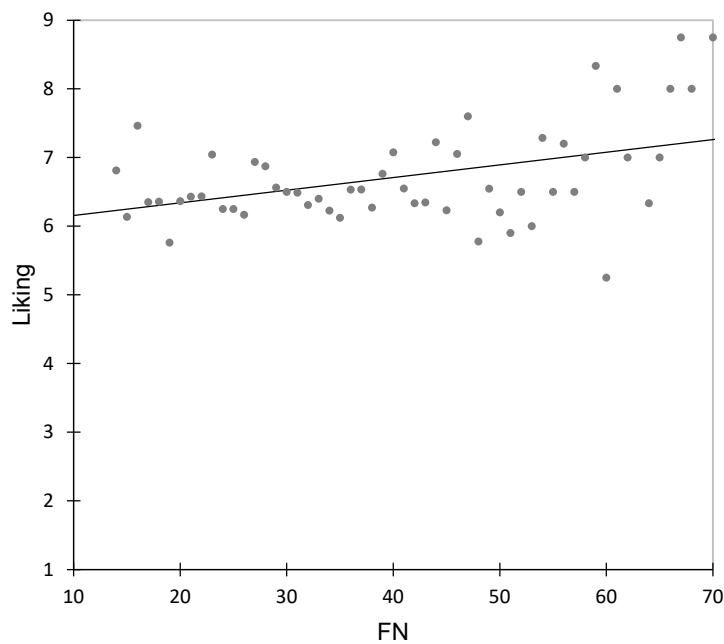

(B)

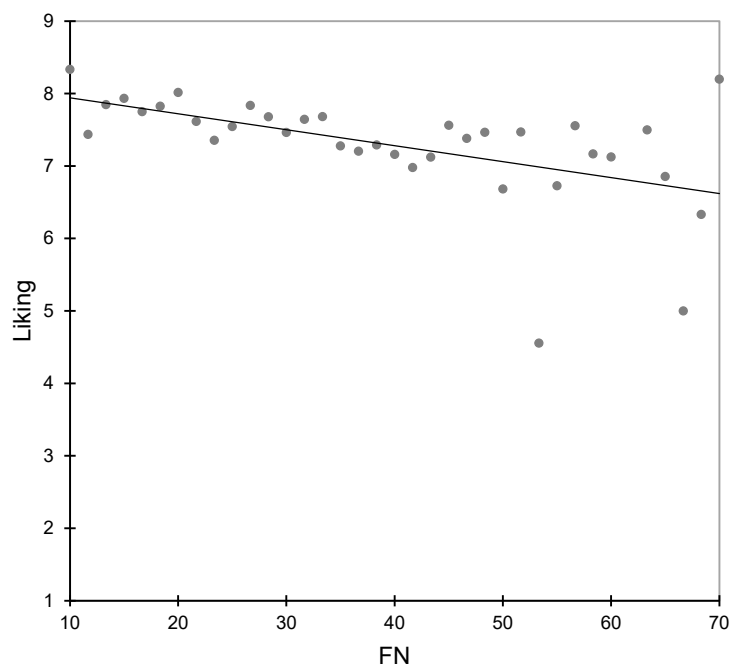

(C)

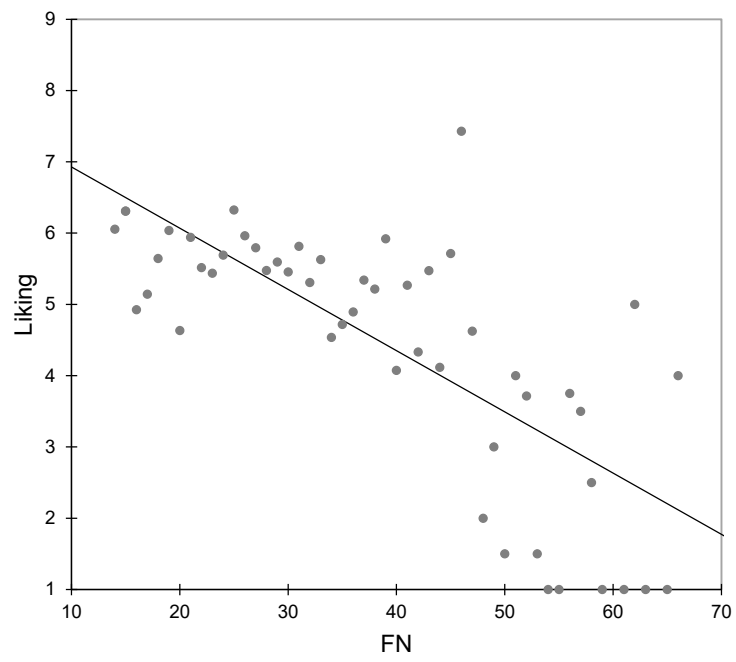

Supplement: s1 [file s1]
